# Supplementary material for: Bronchoalveolar Lavage Fluid IFN-γ+Th17 Cells and Regulatory T Cells in Pulmonary Sarcoidosis
Source: Hindawi journal article supplement (doi:10.1155/2014/438070), 2014-01-01
Supplement: f1 [file 438070.f1.pdf]

**Supplementary Table 1: Antibody panel for surface and intracellular antigen staining**

| Tube     | Antibody conjugates          |                              |                              |                              |                              |                   | Staining                  |
|----------|------------------------------|------------------------------|------------------------------|------------------------------|------------------------------|-------------------|---------------------------|
|          | FITC                         | PE                           | PerCP-Cy5.5                  | PE-Cy7                       | APC                          | APC-Cy7           |                           |
| <b>1</b> | Isotype control <sup>1</sup> | Isotype control <sup>1</sup> | Isotype control <sup>2</sup> | Isotype control <sup>2</sup> | Isotype control <sup>1</sup> | CD45 <sup>2</sup> | Surface                   |
| <b>2</b> | CD8 <sup>1</sup>             | CD4 <sup>1</sup>             | HLA-DR <sup>2</sup>          |                              | CD3 <sup>1</sup>             |                   | Surface                   |
| <b>3</b> | CD4 <sup>2</sup>             | FoxP3 <sup>2</sup>           | CD8 <sup>2</sup>             | CD27 <sup>2</sup>            | CD39 <sup>2</sup>            | CD25 <sup>2</sup> | Intracellular             |
| <b>4</b> | CD4 <sup>2</sup>             | IL-17A <sup>2</sup>          | CD8 <sup>2</sup>             | IFN- $\gamma$ <sup>2</sup>   | FoxP3 <sup>2</sup>           | CD3 <sup>2</sup>  | Intracellular<br>+mitogen |

**Footnote Supplementary Table 1:** <sup>1</sup>Multimix, Dako Denmark AS, Glostrup Denmark, <sup>2</sup>BD Biosciences, San Jose, USA. FITC: Fluorescein isothiocyanate, PE: phycoerythrobilin, PerCP-Cy5.5: Peridinin chlorophyll protein with cyanine dye (Cy5.5), APC: Allophycocyanin.
